# Supplementary material for: The Meristogram: a neglected tool for acanthocephalan systematics
Source: Biodivers Data J. 2016 Feb 4;(4):e7606. doi: 10.3897/BDJ.4.e7606 (PMC4759448; doi:10.3897/BDJ.4.e7606)
Supplement: Supplementary material 4 — Hook measurement data from male Echinorhynchus bothniensis [file biodiversity_data_journal-4-e7606-s004.csv]

specimen	hook	length	base
b2.08	1	47.64	13.76
b2.08	2	54	13.73
b2.08	3	55.39	12.75
b2.08	4	58.76	14.73
b2.08	5	59.69	17.91
b2.08	6	60.62	16.51
b2.08	7	59.23	18.47
b2.08	8	58.07	17.48
b2.08	9	56.34	17.44
b2.08	10	49.82	13.74
b2.08	11	38.41	12
b2.08	12	24.69	7.91
b2.10	1	50.06	10.63
b2.10	2	55.96	12.94
b2.10	3	55.9	15.35
b2.10	4	59.2	16.36
b2.10	5	56.37	16.86
b2.10	6	55.15	16.03
b2.10	7	55.02	18.3
b2.10	8	53.11	16.24
b2.10	9	49.5	14.67
b2.10	10	40	11.55
b2.10	11	31.2	6.58
b2.13	1	50.98	13.16
b2.13	2	56.01	15.05
b2.13	3	59.41	17.44
b2.13	4	58.29	18.15
b2.13	5	57.02	16.36
b2.13	6	55.83	19.53
b2.13	7	54.82	17.91
b2.13	8	54.12	18.65
b2.13	9	50.55	17.52
b2.13	10	44.96	12.56
b2.13	11	35.99	10.64
b2.14	1	43.45	10.27
b2.14	2	46.62	10.47
b2.14	3	47.13	12.24
b2.14	4	48.95	13.43
b2.14	5	50.01	15.17
b2.14	6	48.85	15.9
b2.14	7	48.88	16.06
b2.14	8	47.69	14.26
b2.14	9	47.11	15.9
b2.14	10	45.98	14.28
b2.14	11	43.28	10.73
b2.16	1	45.43	9.46
b2.16	2	51.43	12.72
b2.16	3	54.62	14.58
b2.16	4	54.72	14.54
b2.16	5	55.75	14.53
b2.16	6	54.6	15.79
b2.16	7	54.69	17.44
b2.16	8	54.15	17.45
b2.16	9	50	15.7
b2.16	10	42.59	12.39
b2.16	11	35.86	8.76
b2.16	12	31.99	5.81
