# Supplementary material for: The Meristogram: a neglected tool for acanthocephalan systematics
Source: Biodivers Data J. 2016 Feb 4;(4):e7606. doi: 10.3897/BDJ.4.e7606 (PMC4759448; doi:10.3897/BDJ.4.e7606)
Supplement: Supplementary material 7 — Hook measurement data from male Echinorhynchus brayi [file biodiversity_data_journal-4-e7606-s007.csv]

specimen	hook	length	base
_24.001	1	51	10.5
_24.001	2	64.5	15
_24.001	3	72	18
_24.001	4	75	20
_24.001	5	71	22.5
_24.001	6	61.5	16.5
_24.001	7	34.5	10.5
_24.008	1	51	9
_24.008	2	62	13.5
_24.008	3	69	16.5
_24.008	4	70.5	18.75
_24.008	5	70	22.5
_24.008	6	51	13
_24.010	1	46.5	10.5
_24.010	2	62	16
_24.010	3	63	18
_24.010	4	63.75	22.5
_24.010	5	55.5	18
_24.010	6	44	12
_24.013	1	48	10.5
_24.013	2	63	15
_24.013	3	69	18
_24.013	4	70.5	21
_24.013	5	58.5	16.5
_24.013	6	39	9
_24.018	1	52	12
_24.018	2	64.5	16.5
_24.018	3	68	20
_24.018	4	65	19.5
_24.018	5	49.5	14
_24.018	6	36	11
_24.019	1	62	16.5
_24.019	2	66	18
_24.019	3	69	19
_24.019	4	69	21
_24.019	5	49.5	15
_24.019	6	38	8
_24.021	1	43.5	10.5
_24.021	2	58.5	15
_24.021	3	60	19.5
_24.021	4	58.5	19.5
_24.021	5	46.5	16
_24.021	6	37	10.5
