# Supplementary material for: The Meristogram: a neglected tool for acanthocephalan systematics
Source: Biodivers Data J. 2016 Feb 4;(4):e7606. doi: 10.3897/BDJ.4.e7606 (PMC4759448; doi:10.3897/BDJ.4.e7606)
Supplement: Supplementary material 8 — Hook measurement data from female Echinorhynchus gadi sp. A [file biodiversity_data_journal-4-e7606-s008.csv]

specimen	hook	length	base
C005C	1	67.7	17.1
C005C	2	68.2	18.2
C005C	3	70	20.4
C005C	4	68.2	21.5
C005C	5	71	22
C005C	6	66.5	20.6
C005C	7	66.7	23
C005C	8	65	23.8
C005C	9	61.6	24.4
C005C	10	59.7	26
C005C	11	50.8	24.5
C005C	12	51.8	15.1
C005C	13	43.7	11.3
C005C	14	47.7	9.4
C009bD	1	63.8	15.2
C009bD	2	69.8	19.2
C009bD	3	71.7	18.2
C009bD	4	69.2	22.8
C009bD	5	72.6	25.9
C009bD	6	69.8	24.9
C009bD	7	68.1	28.3
C009bD	8	66.8	32.1
C009bD	9	63.4	29.9
C009bD	10	64.9	19.6
C009bD	11	58.6	20.6
C009bD	12	49.1	9.4
C009aA	1	52.1	16.9
C009aA	2	61.6	18.7
C009aA	3	65.9	21
C009aA	4	63.8	22.4
C009aA	5	65.3	24.1
C009aA	6	67	26.4
C009aA	7	62.3	24.9
C009aA	8	60.2	24.9
C009aA	9	59.9	24.2
C009aA	10	51.8	15.6
C009aA	11	43.7	11.4
C009cC	1	59.6	18
C009cC	2	66.1	22.6
C009cC	3	64	23.3
C009cC	4	60.1	23.3
C009cC	5	58.2	23.6
C009cC	6	57.3	24.9
C009cC	7	53.5	27.1
C009cC	8	53.7	24.7
C009cC	9	48	18.2
C009cC	10	40.9	12
