# Supplementary material for: The Meristogram: a neglected tool for acanthocephalan systematics
Source: Biodivers Data J. 2016 Feb 4;(4):e7606. doi: 10.3897/BDJ.4.e7606 (PMC4759448; doi:10.3897/BDJ.4.e7606)
Supplement: Supplementary material 9 — Hook measurement data from male Echinorhynchus gadi sp. A [file biodiversity_data_journal-4-e7606-s009.csv]

specimen	hook	length	base
C002	1	51.6	17
C002	2	57.4	19.2
C002	3	55.4	19.4
C002	4	56.6	22.2
C002	5	53.3	19.9
C002	6	52.6	21.5
C002	7	51.7	23.8
C002	8	46.6	20.4
C002	9	47.1	21.9
C002	10	49.2	17.9
C002	11	42.8	15
C002	12	36.8	9.6
C007	1	64.3	17.4
C007	2	67.3	20.6
C007	3	65.8	20.6
C007	4	66	21.2
C007	5	62.2	20.2
C007	6	61.5	21.6
C007	7	58.8	21.9
C007	8	55.6	23.1
C007	9	58.5	26
C007	10	49.1	15.1
C007	11	44.1	12
