# Supplementary material for: The Meristogram: a neglected tool for acanthocephalan systematics
Source: Biodivers Data J. 2016 Feb 4;(4):e7606. doi: 10.3897/BDJ.4.e7606 (PMC4759448; doi:10.3897/BDJ.4.e7606)
Supplement: Supplementary material 15 — Hook measurement data from ventral rows of female Echinorhynchus salmonis [file biodiversity_data_journal-4-e7606-s015.csv]

specimen	hook	length	base
v17.15	1	82.07	16.15
v17.15	2	102.34	21.14
v17.15	3	110.03	25.63
v17.15	4	107.24	25.47
v17.15	5	100.96	25.72
v17.15	6	98	25.14
v17.15	7	94.16	24.67
v17.15	8	90.56	24.34
v17.15	9	64.73	15.88
v17.15	10	47.57	9.15
v17.17	1	97.66	21.33
v17.17	2	106.43	23.79
v17.17	3	107.99	26.13
v17.17	4	112.99	27.45
v17.17	5	107.93	27.82
v17.17	6	103.27	27.82
v17.17	7	98.24	27.84
v17.17	8	95.92	29.99
v17.17	9	80.81	17.51
v17.17	10	71.08	16.03
v17.18	1	53.88	12.86
v17.18	2	92.56	24.94
v17.18	3	99.94	28.04
v17.18	4	98.56	27.34
v17.18	5	97.33	29.55
v17.18	6	90.88	28.27
v17.18	7	75.63	29.47
v17.18	8	64.33	19.97
v17.18	9	43.02	11.58
v17.20	1	101.08	20.6
v17.20	2	113.91	28.5
v17.20	3	114.11	29.85
v17.20	4	107.58	31.21
v17.20	5	105.42	32.74
v17.20	6	100.16	31.95
v17.20	7	97.54	36.6
v17.20	8	77.16	20.13
v17.20	9	57.62	14.18
v17.20	10	51.94	12.22
v17.25	1	92.83	18.42
v17.25	2	114.18	29.04
v17.25	3	111.98	32.42
v17.25	4	110.52	31.59
v17.25	5	103.62	30.77
v17.25	6	98.44	31.39
v17.25	7	94.69	30.48
v17.25	8	89.91	29.95
v17.25	9	76.04	19.25
v17.25	10	60.96	15.33
v17.28	1	100.51	12.74
v17.28	2	121.11	21.23
v17.28	3	123.7	25.5
v17.28	4	118.37	28.3
v17.28	5	110.4	30.19
v17.28	6	102.65	29.33
v17.28	7	101.43	29.33
v17.28	8	99.19	29.9
v17.28	9	71.17	15.13
v17.28	10	59.52	14.06
v17.30	1	103.98	19.92
v17.30	2	122.95	27.91
v17.30	3	122.52	33.39
v17.30	4	115.97	33.19
v17.30	5	108.67	33.59
v17.30	6	102.34	33.22
v17.30	7	93.89	30.06
v17.30	8	60.04	14.38
v17.30	9	61.63	14.81
v17.37	1	96.92	16.93
v17.37	2	111.73	22.42
v17.37	3	116.91	28.15
v17.37	4	111.47	29.57
v17.37	5	103.72	28.55
v17.37	6	97.23	28.55
v17.37	7	95	27.93
v17.37	8	94.36	28.57
v17.37	9	71.05	18.47
v17.37	10	62.75	15.51
v17.39	1	116.73	25.08
v17.39	2	122.67	32.14
v17.39	3	121.19	33.15
v17.39	4	114.68	34.2
v17.39	5	108.37	33.98
v17.39	6	101.26	33.86
v17.39	7	99.47	33.8
v17.39	8	91.33	30.86
v17.39	9	72.42	18.27
v17.39	10	65.8	13.95
v17.40	1	81.04	11.04
v17.40	2	103.3	20.47
v17.40	3	110.91	25.01
v17.40	4	109.35	27.06
v17.40	5	104.35	27.49
v17.40	6	101.67	28.78
v17.40	7	96.84	29.46
v17.40	8	89.02	27.96
v17.40	9	67.06	15.64
v17.40	10	59.92	14.38
v17.41	1	100.11	17.58
v17.41	2	114.44	22.68
v17.41	3	116.91	26.43
v17.41	4	115.24	29.32
v17.41	5	106.12	29.61
v17.41	6	98.91	29.41
v17.41	7	96	29.05
v17.41	8	91.77	25.84
v17.41	9	49.32	14
v17.41	10	49.24	11.43
v17.42	1	99.64	18.2
v17.42	2	121.81	26.73
v17.42	3	124.36	30.85
v17.42	4	121.89	32.39
v17.42	5	112.71	32.2
v17.42	6	107.67	34.72
v17.42	7	97.74	32.24
v17.42	8	91.45	27.14
v17.42	9	68.22	17.91
v17.42	10	58.2	17.42
v17.45	1	106.36	20.68
v17.45	2	125.81	32.51
v17.45	3	126.9	37.23
v17.45	4	122.45	36.92
v17.45	5	111.31	33.3
v17.45	6	108.01	28.54
v17.45	7	92.41	25.63
v17.45	8	69.32	20.27
v17.45	9	62.63	15.82
v17.47	1	109.25	19.06
v17.47	2	121.53	26.54
v17.47	3	117.83	30.36
v17.47	4	115.05	30.52
v17.47	5	109.29	31.99
v17.47	6	102.82	33.14
v17.47	7	80.33	21.23
v17.47	8	62.97	14.78
v17.47	9	52.22	15.98
v5.02	1	116.71	23.17
v5.02	2	122.45	25.87
v5.02	3	124.34	28.34
v5.02	4	122	30.93
v5.02	5	111.92	32.85
v5.02	6	104.75	33.54
v5.02	7	104.05	33.54
v5.02	8	104.7	33.63
v5.02	9	72.98	20.86
v5.02	10	58	16.9
v5.02	11	55.42	14.85
v5.10	1	91.36	17.8
v5.10	2	112.25	29.18
v5.10	3	112.91	30.86
v5.10	4	117.24	34.6
v5.10	5	113.37	34.2
v5.10	6	108.72	35.96
v5.10	7	103.41	36.16
v5.10	8	89.91	28.58
v5.10	9	72.59	19.33
v5.10	10	69.14	17.54
v5.12	1	100.19	18.82
v5.12	2	119.88	27.12
v5.12	3	118.65	27.87
v5.12	4	116.3	30
v5.12	5	112.15	34.25
v5.12	6	106.93	32.98
v5.12	7	100.3	30.07
v5.12	8	70.23	18.51
v5.12	9	62.44	15.12
v5.19	1	107.63	23.84
v5.19	2	116.6	31
v5.19	3	113.45	30.99
v5.19	4	112.06	34.25
v5.19	5	106.07	32.02
v5.19	6	102.39	31.39
v5.19	7	99.64	32.19
v5.19	8	76.88	22.11
v5.19	9	60.39	14.39
v5.19	10	59.65	14.79
v5.20	1	107.88	19.69
v5.20	2	123.89	25.65
v5.20	3	124.38	31.06
v5.20	4	124.05	32.78
v5.20	5	115.2	33.4
v5.20	6	111.31	35.68
v5.20	7	108.08	34.98
v5.20	8	91.82	28.45
v5.20	9	71.91	16.74
v5.20	10	66.6	11.79
v5.33	1	100.14	19.3
v5.33	2	113.99	28.99
v5.33	3	115.11	33.64
v5.33	4	114.96	35.34
v5.33	5	106.94	35.01
v5.33	6	101.99	35.23
v5.33	7	93.18	30.21
v5.33	8	66.87	18.96
v5.33	9	42.79	13.57
v5.35	1	104.45	18.92
v5.35	2	115.47	24.43
v5.35	3	113.52	26.85
v5.35	4	109.21	29.98
v5.35	5	103.96	29.43
v5.35	6	93.2	29.06
v5.35	7	90.34	28.76
v5.35	8	74.36	22.34
v5.35	9	56.81	15
v5.39	1	91.19	13.97
v5.39	2	109.16	22.01
v5.39	3	116.86	25.51
v5.39	4	119.24	29.1
v5.39	5	116.82	30.83
v5.39	6	117.36	31.39
v5.39	7	111.59	34
v5.39	8	102.18	32.3
v5.39	9	97.59	32.03
v5.39	10	77.64	21.35
v5.39	11	56.46	12.56
v5.43	1	106.78	22.26
v5.43	2	118.28	28.8
v5.43	3	117.71	34.75
v5.43	4	116.61	33.8
v5.43	5	115.64	37
v5.43	6	113.48	37.72
v5.43	7	108.66	39.47
v5.43	8	103.17	33.86
v5.43	9	71.88	19.27
v5.43	10	48.5	14.11
v5.46	1	96.92	18.96
v5.46	2	113.63	26.5
v5.46	3	115.53	29.99
v5.46	4	117.03	32.95
v5.46	5	115.68	35.78
v5.46	6	107.1	34.44
v5.46	7	101.28	31.91
v5.46	8	96.47	28.76
v5.46	9	71.54	18.84
v5.46	10	52.52	14.92
v5.47	1	108	20.05
v5.47	2	120.85	25.63
v5.47	3	122.03	30.46
v5.47	4	118.82	31.84
v5.47	5	110.06	32.55
v5.47	6	104.95	31.65
v5.47	7	99.95	32.39
v5.47	8	90.8	30.44
v5.47	9	65.54	14.48
v5.47	10	45.91	12.34
v5.53	1	95.66	18.93
v5.53	2	108.33	25.01
v5.53	3	118.36	29.18
v5.53	4	110.46	28.4
v5.53	5	106.8	29.45
v5.53	6	100.48	31
v5.53	7	94.7	31.86
v5.53	8	83.02	28.51
v5.53	9	70.29	18.16
v5.53	10	56.89	15.82
v5.55	1	82.23	17.91
v5.55	2	105.28	25.84
v5.55	3	112.6	30.07
v5.55	4	112.49	33.5
v5.55	5	107.1	35.42
v5.55	6	101.14	34.26
v5.55	7	96.45	33.41
v5.55	8	68.55	19.45
v5.55	9	54.5	14.8
v5.59	1	98.56	17.52
v5.59	2	127.81	32.33
v5.59	3	129.36	36.17
v5.59	4	117.6	39.8
v5.59	5	121.64	41.02
v5.59	6	119.64	40.99
v5.59	7	107.84	41.19
v5.59	8	104.48	37.08
v5.59	9	78.01	21.2
v5.59	10	71.54	16.9
v5.60	1	99.96	20.93
v5.60	2	111.85	30.45
v5.60	3	122.75	35.93
v5.60	4	124.06	39.77
v5.60	5	120.1	44.59
v5.60	6	113.16	47.23
v5.60	7	107.83	43.64
v5.60	8	78.78	26.39
v5.60	9	68.43	21.89
v5.64	1	104.86	19.08
v5.64	2	118.21	25.82
v5.64	3	118.35	31.1
v5.64	4	111.36	33.97
v5.64	5	99.55	34.23
v5.64	6	96.37	34.23
v5.64	7	90.08	33.39
v5.64	8	78.7	22.9
v5.64	9	70.33	20.82
v5.70	1	101.57	19.41
v5.70	2	109.21	24.55
v5.70	3	116.12	30.18
v5.70	4	113.63	31.99
v5.70	5	108.28	31.79
v5.70	6	99.55	30.48
v5.70	7	98.39	31.89
v5.70	8	95.3	29.98
v5.70	9	67.05	15.95
v5.70	10	54.06	12.74
v5.70	11	53.58	12.11
v5.72	1	92.4	17.91
v5.72	2	114.25	25.01
v5.72	3	116.99	31.33
v5.72	4	117.33	33.99
v5.72	5	113.37	33.8
v5.72	6	108.82	34.03
v5.72	7	105.65	33.19
v5.72	8	100.76	34.5
v5.72	9	68.75	21.52
v5.72	10	72.84	18.69
v5.82	1	87.95	16.44
v5.82	2	102.73	22.69
v5.82	3	111.31	26.39
v5.82	4	107.32	28.23
v5.82	5	105.95	29.05
v5.82	6	105.5	32.1
v5.82	7	101.48	29.7
v5.82	8	95.96	27.11
v5.82	9	66.93	17.32
v5.82	10	66.82	16.72
v5.90	1	91	15.49
v5.90	2	111.21	25.03
v5.90	3	121.84	33.01
v5.90	4	120.89	35.56
v5.90	5	114.73	35.27
v5.90	6	107.66	36.34
v5.90	7	103.49	36.91
v5.90	8	97.08	35.54
v5.90	9	74.19	21.4
v5.90	10	65.29	16.29
v5.91	1	106.55	20.8
v5.91	2	117.14	25.2
v5.91	3	120.29	30.27
v5.91	4	123.36	34.03
v5.91	5	116.65	35.04
v5.91	6	111.5	37.15
v5.91	7	108.57	39.77
v5.91	8	106.46	40.37
v5.91	9	88.07	28.15
v5.91	10	76.8	20.36
v5.93	1	83.62	17.52
v5.93	2	99.79	24.72
v5.93	3	103.17	28.77
v5.93	4	104.08	30.22
v5.93	5	100.02	30.99
v5.93	6	96.43	33.16
v5.93	7	87.72	29.38
v5.93	8	75	18.6
v5.93	9	65.01	18.51
